# Supplementary material
Source: MDPI journal article supplement (https://www.mdpi.com/2071-1050/14/13/7919)
Supplement: s1 [file s1]

**Table S1.** Socio-demographic and farm-related data of the sampled biotech corn farmers in Pampanga, Philippines.

| Variable                                            | Frequency (n=111) | Percentage (%) |
|-----------------------------------------------------|-------------------|----------------|
| <b>Age</b>                                          |                   |                |
| 24 and below                                        | 1                 | 1              |
| 25-44                                               | 25                | 22             |
| 45-64                                               | 55                | 50             |
| 65 and above                                        | 30                | 27             |
| <b>Sex</b>                                          |                   |                |
| Male                                                | 103               | 93             |
| Female                                              | 8                 | 7              |
| <b>Education</b>                                    |                   |                |
| Elementary                                          | 57                | 51             |
| High school                                         | 36                | 33             |
| College                                             | 10                | 9              |
| Vocational                                          | 8                 | 7              |
| <b>Civil status</b>                                 |                   |                |
| Single                                              | 3                 | 3              |
| Married                                             | 99                | 89             |
| Widow/widower                                       | 8                 | 7              |
| Separated                                           | 1                 | 1              |
| <b>Family size</b>                                  |                   |                |
| 1-5                                                 | 58                | 52             |
| 6-11                                                | 52                | 47             |
| 12 and above                                        | 1                 | 1              |
| <b>Affiliation with agricultural organization/s</b> |                   |                |
| Member                                              | 73                | 66             |
| Not a member                                        | 38                | 34             |
| <b>Number of years farming</b>                      |                   |                |
| 16 and below                                        | 32                | 29             |
| 17-33                                               | 34                | 30             |
| 34-50                                               | 33                | 30             |
| 51 and above                                        | 12                | 11             |
| <b>Number of years planting biotech corn</b>        |                   |                |
| 1-5                                                 | 31                | 28             |
| 6-11                                                | 24                | 22             |
| 12 and above                                        | 56                | 50             |
| <b>Farm size</b>                                    |                   |                |
| 7 ha and below                                      | 108               | 97             |
| 8-15 ha                                             | 2                 | 2              |
| 16 ha and above                                     | 1                 | 1              |
| <b>Farmland allotted to biotech corn</b>            |                   |                |
| 2.5 ha and below                                    | 75                | 67             |
| 3-5                                                 | 34                | 31             |
| 6 and above                                         | 2                 | 2              |

Table S1 continued...

|                                                                                         |    |    |
|-----------------------------------------------------------------------------------------|----|----|
| <b>Topography of farm</b>                                                               |    |    |
| Plain                                                                                   | 85 | 77 |
| Mountainous, slope                                                                      | 15 | 13 |
| Mixed                                                                                   | 11 | 10 |
| <b>Ownership of farm</b>                                                                |    |    |
| Owned                                                                                   | 65 | 59 |
| Rented                                                                                  | 29 | 26 |
| Combination of owned and rented                                                         | 17 | 15 |
| <b>Estimated income from farming biotech corn based on hectares and cropping season</b> |    |    |
| Php 120,000 and below                                                                   | 81 | 73 |
| Php 120,0001 – 240,000                                                                  | 17 | 15 |
| Php 240,001 – 360,000                                                                   | 9  | 8  |
| Php 360,001 and above                                                                   | 4  | 4  |
| <b>Sources of biotech corn seeds *</b>                                                  |    |    |
| Trader                                                                                  | 82 | 74 |
| Seed company                                                                            | 22 | 20 |
| Cooperative                                                                             | 20 | 18 |
| Town market                                                                             | 12 | 11 |
| Barangay captain                                                                        | 5  | 4  |
| Miller                                                                                  | 4  | 4  |
| Agricultural technicians                                                                | 2  | 2  |
| <b>Market outlets *</b>                                                                 |    |    |
| Trader                                                                                  | 93 | 84 |
| Cooperative                                                                             | 11 | 10 |
| Town market                                                                             | 9  | 8  |
| Barangay captain                                                                        | 7  | 6  |
| Miller                                                                                  | 6  | 5  |

\* multiple answer

**Table S2.** Spearman correlation of socio-demographic and farm-related data with farmers' perceived correctness of the ban.

| <b>Variable</b>                                                                     | <b>Estimate</b> | <b>Significance</b> |
|-------------------------------------------------------------------------------------|-----------------|---------------------|
| Age                                                                                 | 0.162           | 0.090               |
| Sex                                                                                 | 0.000           | 1.000               |
| Education                                                                           | -0.054          | 0.576               |
| Civil status                                                                        | 0.075           | 0.437               |
| Family size                                                                         | 0.007           | 0.941               |
| Affiliation with agricultural organization/s                                        | -0.062          | 0.521               |
| Number of years farming                                                             | 0.095           | 0.323               |
| Number of years planting biotech corn                                               | -0.198          | 0.037 *             |
| Farm size                                                                           | 0.070           | 0.463               |
| Farmland allotted to biotech corn                                                   | -0.016          | 0.869               |
| Topography of farm                                                                  | -0.065          | 0.498               |
| Ownership of farm                                                                   | -0.094          | 0.327               |
| Estimated income from farming biotech corn<br>based on hectares and cropping season | -0.076          | 0.427               |

\* significant at  $p < 0.05$  level
